# Supplementary material
Source: MDPI journal article supplement (https://www.mdpi.com/2311-7524/8/10/865)
Supplement: s1 [file s1]

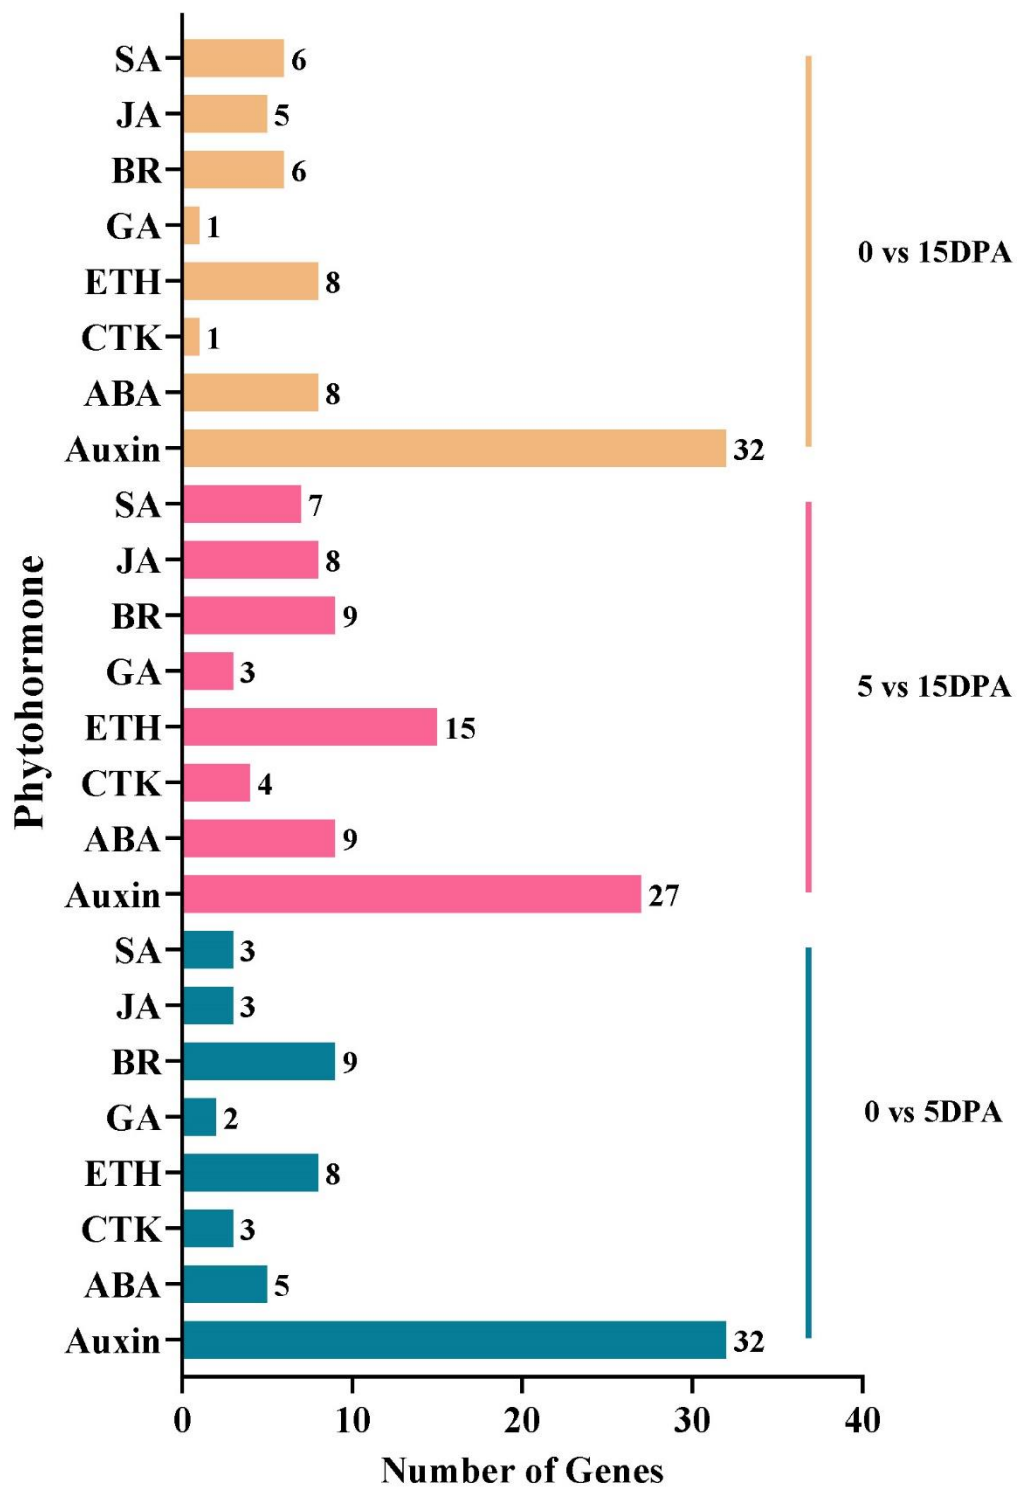

**Figure S1.** The number of DEGs related to pedicel AZ development which enriched in plant hormone pathway.

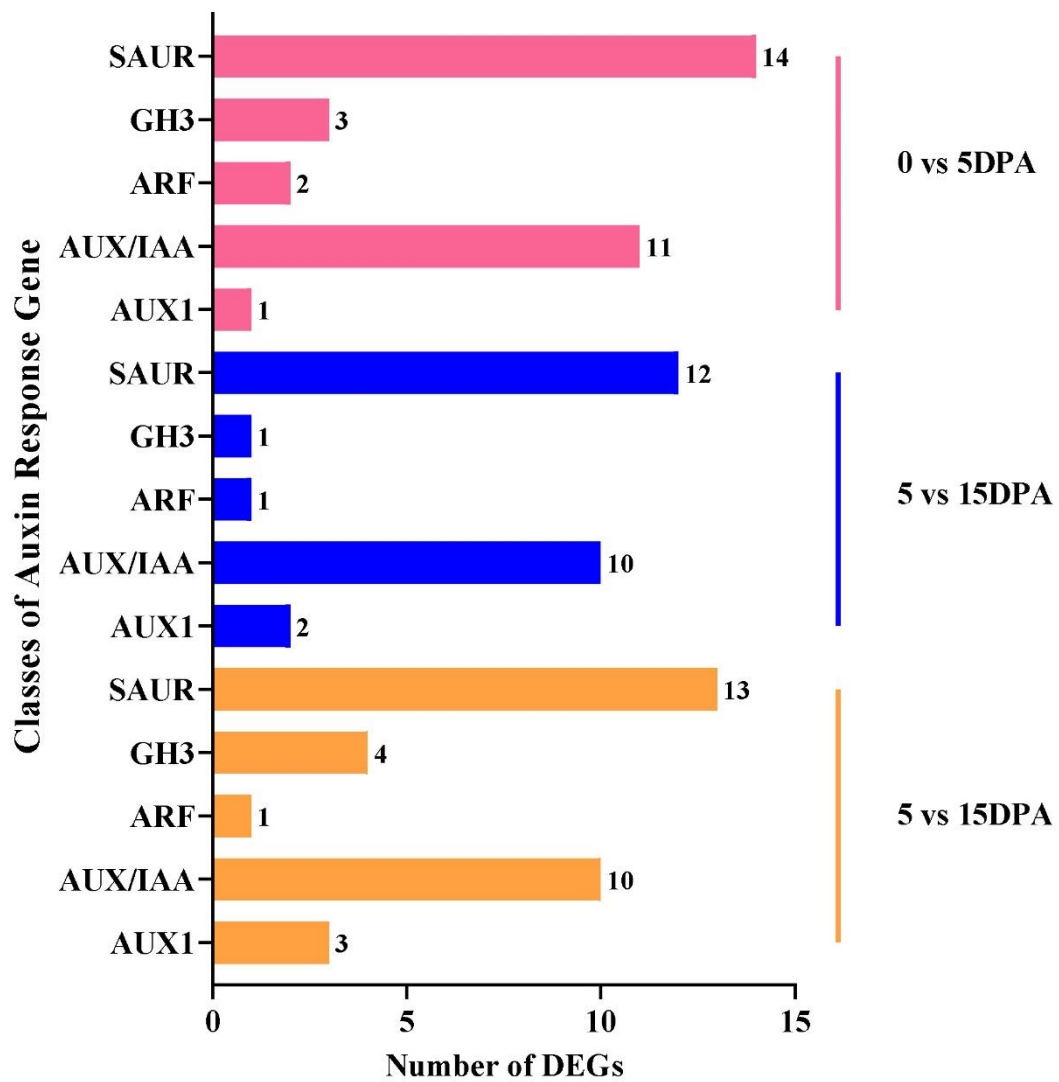

**Figure S2.** The enrichment analysis of the DEGs belong to different classes of auxin response gene.
